# Supplementary material
Source: PubMed Central journal article supplement (PMC3021228)
Supplement: supp_193.3.649_Shimada_et_al___Supp_Table_.pdf [file supp_193.3.649_Shimada_et_al___Supp_Table_.pdf]

**Supplemental Table 1. Primers used for promoter assay**

| Primer   | Sequence                                 |
|----------|------------------------------------------|
| p-ptsH-F | CCGGAATTCGGCGTTGAACTACAAGAAGATGAAAGC     |
| p-ptsH-R | CGCGGATCCTGTATTTCCCAACTTATAGGTTTAGTGTTG  |
| p-ptsG-F | CCGGAATTCTGGATCGGTTACTGGTGGAACTG         |
| p-ptsG-R | CGCGGATCCAATTGAGAGTGCTCCTGAGTATGGG       |
| p-sgrS-F | CCGGAATTCATGCGCGTTAGCGAACTGAAGATTTG      |
| p-sgrS-R | CGCGGATCCTGATAAACTGACGCATGGGGCAC         |
| p-fruB-F | CCGGAATTC AATACCGGTGAGAAAGGCAACGATTA     |
| p-fruB-R | CGCGGATCCAGTTCTCCTCTCTTGCTGAATTGAAACG    |
| p-setB-F | CCGGAATTCGAGGAACGTTGAGGTTTGCTGTTC        |
| p-setB-R | CGCGGATCCGCTGGTCGATCACTGGAAGAGGA         |
| p-pykA-F | CCGGAATTCATCATGTCCGTCATTCCTGATAAATC      |
| p-pykA-R | CGCGGATCCGTAATACTCCGTTGACTGAAACAACCAG    |
| p-glk-F  | CCGGAATTCAGAATTAATGCTACGATAAGTCCAGGTAG   |
| p-glk-R  | CGCGGATCCTCTTCAACTGCTCCGCTAAAGTCAAAT     |
| p-pps-F  | CCGGAATTCCTCTCATTTTCGACAAACGGCAGC        |
| p-pps-R  | CGCGGATCCCGAACAATCCTTTTGTGATAAATGAACGG   |
| p-fbaB-F | CCGGAATTCGTCTGTTGCGCAGCGAAATACATC        |
| p-fbaB-R | CGCGGATCCTACTATGCTCCCGTAAATTCCGATTG      |
| p-tpiA-F | CCGGAATTCACTGAACGAATTTTCGTGCCATCGAC      |
| p-tpiA-R | CGCGGATCCTTTAATTCTCCACGCTTATAAGCGAATAAAG |
| p-gpmM-F | CCGGAATTCGTGCTTCTCAAGCTCACCAACATTG       |
| p-gpmM-R | CGCGGATCCTGCGACAACCTCATACTCAAGAGTC       |
| p-ppc-F  | CCGGAATTCACCTTTGGTGTACTTGGGGCGATT        |
| p-ppc-R  | CGCGGATCCATTACCCAGACACCCCATCTTATC        |
| p-zwf-F  | CCGGAATTCGTGCATCTTCATTGACATTGCGATTAAC    |
| p-zwf-R  | CGCGGATCCGTCATTCTCCTTAAGTTAACTAACCCG     |
| p-glgC-F | CCGGAATTCACGCCCTGTTAACAACGTTGTTG         |
| p-glgC-R | CGCGGATCCGACTAACTCCTTTTTTATCATCTCTGGAAC  |
| p-pdhR-F | CCGGAATTCGTGCTTCCATCATGAAACCTC           |
| p-pdhR-R | CGCGGATCCGAGTTCCTGTCTTAAGCCACTTGC        |
| p-cyoA-F | CCGGAATTCGTGCTTGGTGGTTTGCTGGATTATC       |
| p-cyoA-R | CGCGGATCCTTAACGACCTCAATTCCACGGGATC       |
| p-prpB-F | CCGGAATTCCTTAATCAAATAACTGGCACTGACAGGC    |
| p-prpB-R | CGCGGATCCAGCCCATCCTTTGTTATCAACTTGTTATTTG |
| p-adhE-F | CCGGAATTCGGAAAATCAAAAAGGTCTGAATCACGG     |
| p-adhE-R | CGCGGATCCAATGCTCTCCTGATAATGTTAACTTTTTTAG |
| p-marR-F | CCGGAATTCAGGCAATATTGGCACTGGGTTTCATC      |
| p-marR-R | CGCGGATCCATTAGTTGCCCTGGCAAGTAATTAGTTG    |
| p-maeB-F | CCGGAATTCGAAATTGACCGCCAGTTTGTCACAC       |
| p-maeB-R | CGCGGATCCTTGTTGTTCCCTTTCACGTAACGTTTCAC   |
| p-mpl-F  | CCGGAATTCCTTTGCGTGTTACAGCCTTCAAAGAC      |
| p-mpl-R  | CGCGGATCCACGTCACACTATCCTTTTTTAATCTGCCG   |
